# Supplementary material for: Sensitive, Fast, and Specific Immunoassays for Methyltestosterone Detection
Source: MDPI journal article supplement (doi:10.3390/s150510059), 2015-04-29
Supplement: s1 [file s1]

**OPEN ACCESS**

sensors

**ISSN 1424-8220**

www.mdpi.com/journal/sensors

Supplementary Information

Sensitive, Fast, and Specific Immunoassays for Methyltestosterone Detection. *Sensors* 2015, *15*, 10059-10073

Na Kong, Shanshan Song, Juan Peng, Liqiang Liu, Hua Kuang and Chuanlai Xu *

State Key Lab of Food Science and Technology, School of Food Science and Technology,
Jiangnan University, Wuxi 214122, Jiang Su, China; E-Mails: kongxiyangsucc@126.com (N.K.); songshanshan0626@126.com (S.S.); pengjuan2016@163.com (J.P.); raxray@gmail.com (L.L.); kuangh@jiangnan.edu.cn (H.K.)

* Author to whom correspondence should be addressed; E-Mail: xcl@jiangnan.edu.cn;
Tel.: +86-510-8532-9076.


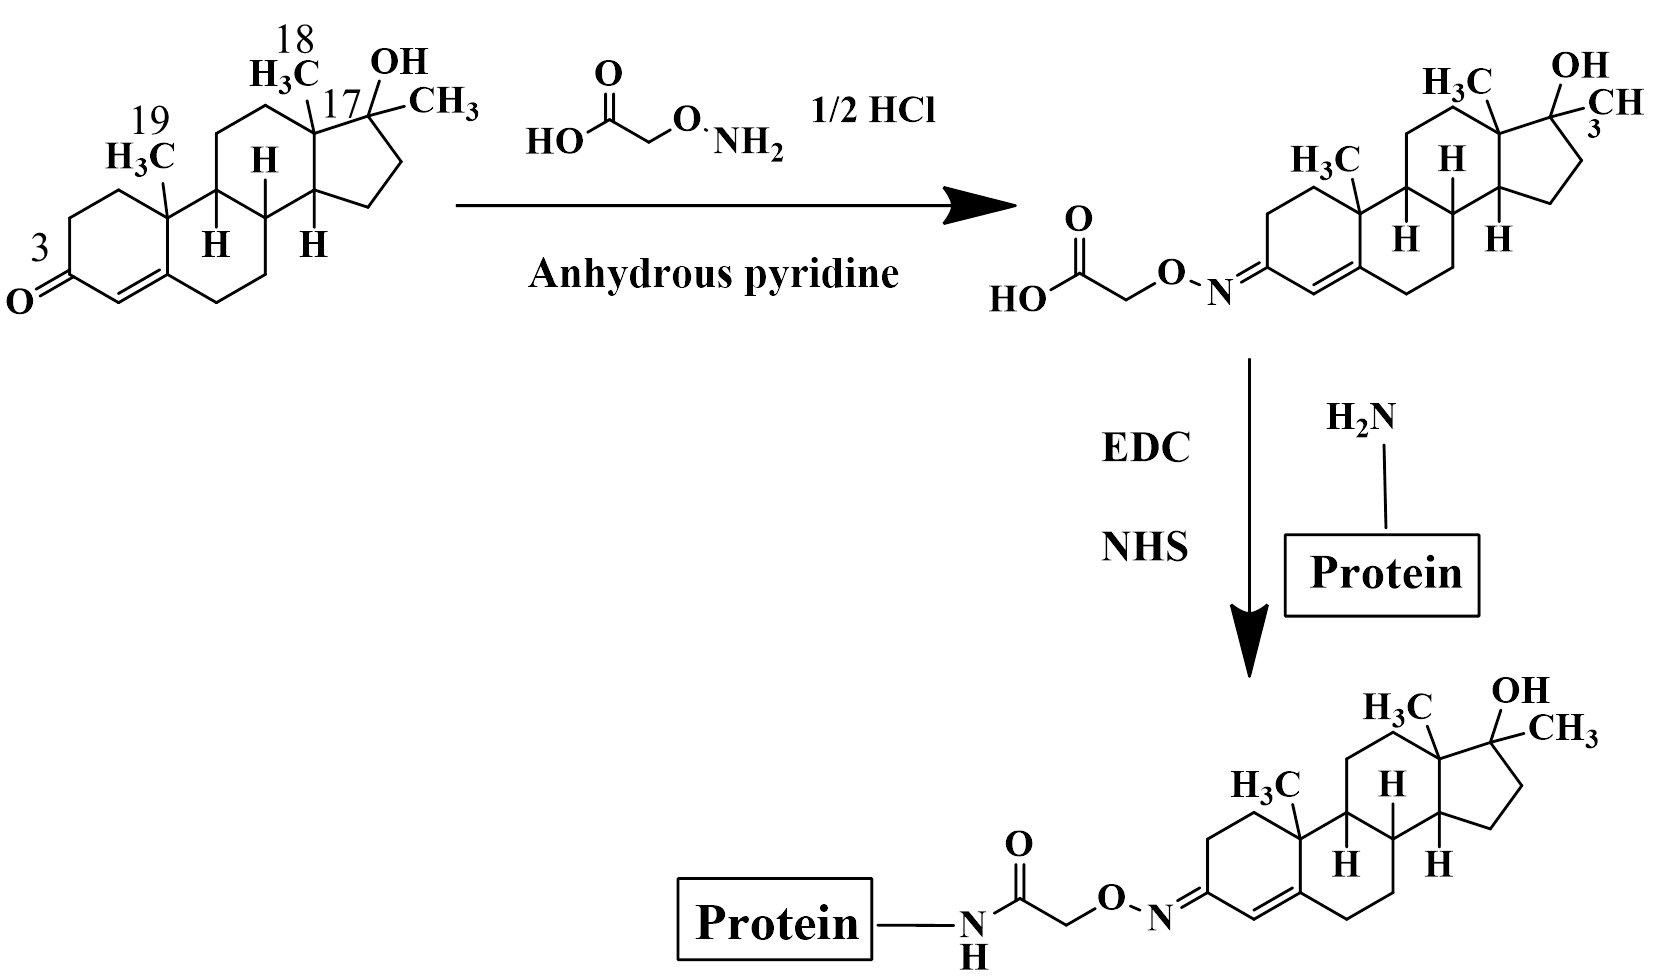


**Figure S1.** The synthesis routes to MT-CMO and MT artificial antigen by the EDC method. The labels 3, 17, 18 and 19 correspond to the carbon bond positions mentioned in the article.


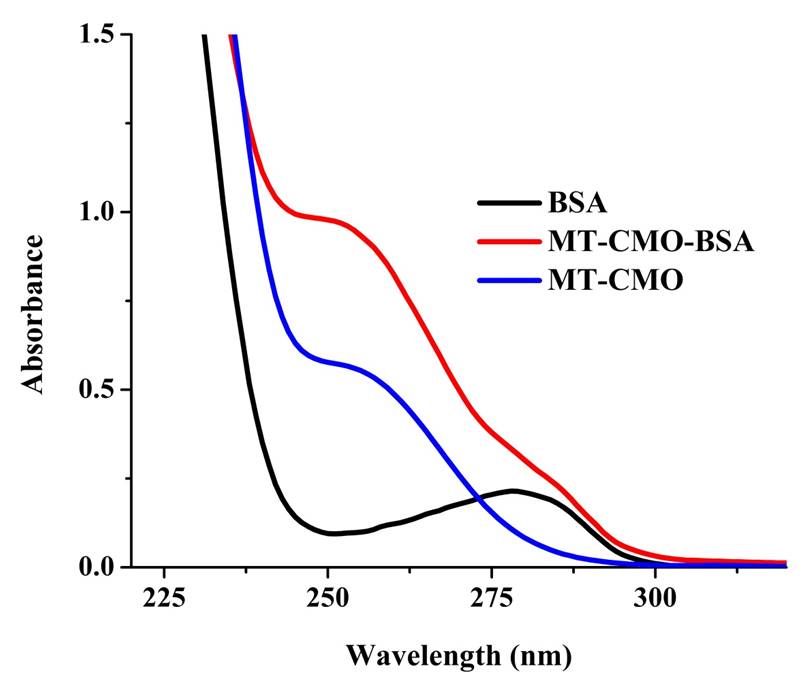


**Figure S2**. UV-Vis spectra of the immunogen for MT.

**Table S1**. Effect factors of the optimized icELISA.

| **Factor** | **Amax** | **IC50** | **Amax/IC50** |
| --- | --- | --- | --- |
| Methanol Content (%) | | | |
| 0 | 1.478 ± 0.015 | 0.418 ± 0.02 | 3.536 ± 0.032 |
| 5 | 1.577 ± 0.026 | 0.567 ± 0.023 | 2.783 ± 0.009 |
| 10 | 1.704 ± 0.011 | 0.418 ± 0.05 | 4.077 ± 0.05 |
| 20 | 1.873 ± 0.049 | 0.626 ± 0.009 | 2.992 ± 0.004 |
| Ionic strength a (mM) | | | |
| 5 | 1.632 ± 0.034 | 0.68 ± 0.017 | 2.400 ± 0.05 |
| 10 | 1.578 ± 0.023 | 0.398 ± 0.024 | 3.965 ± 0.013 |
| 20 | 1.164 ± 0.022 | 0.565 ± 0.024 | 2.060 ± 0.07 |
| 40 | 0.895 ± 0.036 | 0.504 ± 0.092 | 1.776 ± 0.043 |
| pH | | | |
| 4.7 | 0.850 ± 0.002 | 0.456 ± 0.005 | 1.864 ± 0.003 |
| 6.0 | 1.741 ± 0.005 | 0.723 ± 0.038 | 2.408 ± 0.134 |
| 7.4 | 1.428 ± 0.025 | 0.455 ±0.029 | 3.138 ± 0.063 |
| 8.6 | 1.686 ± 0.051 | 0.577 ± 0.026 | 2.922 ± 0.023 |
| 9.6 | 1.490 ± 0.045 | 0.714 ± 0.007 | 2.087 ± 0.045 |

a the concentration of PBS.

**Table S2.** Comparison of LOD and CR for MT detection based on ELISA.

| **CR (%)** | **LOD (ng/mL)** | **Ref.** |
| --- | --- | --- |
| No mention | 0.141 | 42 |
| <78 | 0.266 | 43 |
| non-specificity | 200 | 44 |
| <2.17 | 0.045 | This work |

© 2015 by the authors; licensee MDPI, Basel, Switzerland. This article is an open access article distributed under the terms and conditions of the Creative Commons Attribution license (http://creativecommons.org/licenses/by/4.0/).
